# Supplementary material for: Shape-responsive host–guest chemistry: metal-free tetracationic porphyrin nonplanarity promoted by clay mineral interactions assessed by theoretical simulations
Source: Royal Society of Chemistry journal article supplement (doi:10.1039/d4dt03437f), 2024-12-18
Supplement: d4dt03437f1.pdf [file d4dt03437f1.pdf]

*Supplementary Information*

**Shape-responsive host-guest chemistry: metal-free tetra cationic porphyrin nonplanarity promoted by clay mineral interactions assessed by theoretical simulations**

Eduardo Diaz Suarez,<sup>a</sup> Filipe Camargo Dalmatti Alves Lima,<sup>b</sup> Arles V. Gil Rebaza,<sup>c,d</sup> Vera Regina Leopoldo Constantino,<sup>e\*</sup> Helena Maria Petrilli <sup>a\*</sup>

<sup>a</sup> Departamento de Física dos Materiais e Mecânica, Instituto de Física, Universidade de São Paulo, C. P. 66318, São Paulo, SP, 05508-090, Brazil, \*e-mail: [hmpetril@if.usp.br](mailto:hmpetril@if.usp.br)

<sup>b</sup> Instituto Federal de Educação Ciência e Tecnologia de São Paulo, Campus Matão, SP, 15991-502, Brazil

<sup>c</sup> Instituto de Física La Plata IFLP, CCT La Plata – CONICET, 1900 La Plata, Argentina

<sup>d</sup> Departamento de Física, Fac. de Ciencias Exactas de la Universidad Nacional de La Plata UNLP, 1900 La Plata, Argentina

<sup>e</sup> Departamento de Química Fundamental, Instituto de Química, Universidade de São Paulo, Av. Prof. Lineu Prestes 748, São Paulo, SP, 05508-000, Brazil \*e-mail: [vrlconst@iq.usp.br](mailto:vrlconst@iq.usp.br)

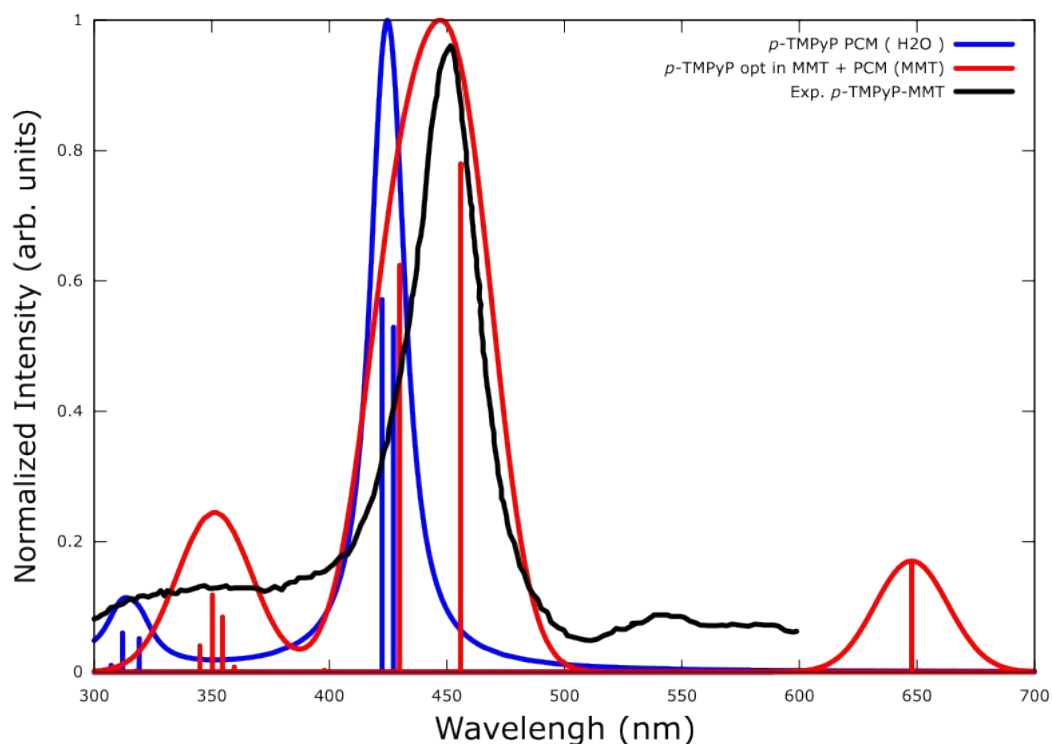

**Fig. S1** Simulated UV-Vis electronic spectra of *p*-TMPyP under different conditions. The blue line represents the single molecule using water dielectric constant values. The red line represents the *p*-TMPyP single molecule that was geometrically optimised on the MMT surface and extracted for the UV-Vis simulation; the values employed by the PCM dielectric constant mimicked the MMT environment. The black line shows the experimental UV-Vis electronic spectrum of the TMPyP-MMT (M. O. Senge, *ECS Trans*, 2015, **66**, 1–10).

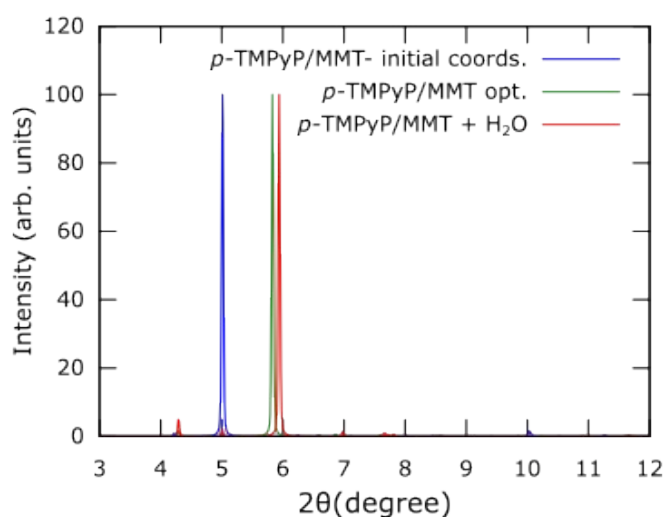

**Fig. S2** Simulated X-ray diffraction pattern of *p*-TMPyP intercalated into MMT without structural optimisation (blue line), after structural optimisation in an anhydrous environment (green line), and after structural optimisation with water molecules randomly located between the layers (red line).

**Table S1** Average bond lengths between atoms in simulated Na-MMT structure.

|               | Bond length (Å) |
|---------------|-----------------|
| Si-O (basal)  | 1.6489          |
| Si-O (apical) | 1.8250          |
| Al-O          | 1.9142          |
| Mg-O          | 2.0728          |
| O-H           | 0.9753          |

**Table S2** Optimised bond lengths (Å) in *p*-TMPyP in a vacuum and adsorbed on (001) MMT surface.

| Bonds                                     | Bond length of <i>p</i> -TMPyP-vacuum | Bond length of <i>p</i> -TMPyP-MMT |
|-------------------------------------------|---------------------------------------|------------------------------------|
| Pyrrol1 C <sub>α</sub> -C <sub>β</sub>    | 1.47                                  | 1.45                               |
| Pyrrol2 C <sub>α</sub> -C <sub>β</sub>    | 1.44                                  | 1.42                               |
| Pyrrol3 C <sub>α</sub> -C <sub>β</sub>    | 1.47                                  | 1.45                               |
| Pyrrol4 C <sub>α</sub> -C <sub>β</sub>    | 1.44                                  | 1.42                               |
| (average valour)                          | 1.46                                  | 1.44                               |
| Pyrrol1 C <sub>α</sub> -C <sub>meso</sub> | 1.41                                  | 1.43                               |
| Pyrrol2 C <sub>α</sub> -C <sub>meso</sub> | 1.41                                  | 1.43                               |
| Pyrrol3 C <sub>α</sub> -C <sub>meso</sub> | 1.41                                  | 1.43                               |
| Pyrrol4 C <sub>α</sub> -C <sub>meso</sub> | 1.41                                  | 1.43                               |
| (average valour)                          | 1.41                                  | 1.43                               |
| C <sub>β</sub> -C <sub>meso</sub>         | 2.54                                  | 2.53                               |
| C <sub>β</sub> -C <sub>meso</sub>         | 2.55                                  | 2.54                               |
| C <sub>β</sub> -C <sub>meso</sub>         | 2.54                                  | 2.53                               |
| C <sub>β</sub> -C <sub>meso</sub>         | 2.55                                  | 2.54                               |
| (average valour)                          | 2.55                                  | 2.54                               |
| Pyrrol2 H- Pyrrol4 H                      | 2.22                                  | 2.42                               |

**Table S3.** Optimised dihedral angles ( $^{\circ}$ ) of *p*-TMPyP in a vacuum and adsorbed on the (001) MMT surface.

| Bonds                                                                   | Dihedral angles of <i>p</i> -TMPyP-vacuum | Dihedral angles of <i>p</i> -TMPyP-MMT |
|-------------------------------------------------------------------------|-------------------------------------------|----------------------------------------|
| Pyrrol1 C $_{\alpha}$ -C $_{meso}$ -C $_{\alpha}$ -C $_{\beta}$ Pyrrol2 | 175.27                                    | 163.50                                 |
| Pyrrol2 C $_{\beta}$ -C $_{\alpha}$ -C $_{meso}$ -C $_{\alpha}$ Pyrrol3 | 175.22                                    | 163.16                                 |
| Pyrrol3 C $_{\alpha}$ -C $_{meso}$ -C $_{\alpha}$ -C $_{\beta}$ Pyrrol4 | 175.27                                    | 165.56                                 |
| Pyrrol4 C $_{\beta}$ -C $_{\alpha}$ -C $_{meso}$ -C $_{\alpha}$ Pyrrol1 | 175.17                                    | 165.46                                 |
| (average valour)                                                        | 175.23                                    | 164.42                                 |
| Methyl-pyridyl dihedral 1                                               | 64.27                                     | 44.30                                  |
| Methyl-pyridyl dihedral 2                                               | 64.38                                     | 44.92                                  |
| Methyl-pyridyl dihedral 3                                               | 63.78                                     | 43.88                                  |
| Methyl-pyridyl dihedral 4                                               | 63.71                                     | 43.37                                  |
| (average valour)                                                        | 64.04                                     | 44.12                                  |

**Table S4** Optimised bond lengths ( $\text{\AA}$ ) of *p*-TMPyP on MMT, *p*-TMPyP intercalated into anhydrous MMT, and *p*-TMPyP intercalated into hydrated MMT.

| Bonds                               | Bond length in <i>p</i> -TMPyP on MMT | Bond length in <i>p</i> -TMPyP intercalated into anhydrous MMT | Bond length in <i>p</i> -TMPyP intercalated into hydrated MMT |
|-------------------------------------|---------------------------------------|----------------------------------------------------------------|---------------------------------------------------------------|
| Pyrrol1 C $_{\alpha}$ -C $_{\beta}$ | 1.44                                  | 1.45                                                           | 1.42                                                          |
| Pyrrol2 C $_{\alpha}$ -C $_{\beta}$ | 1.41                                  | 1.41                                                           | 1.42                                                          |
| Pyrrol3 C $_{\alpha}$ -C $_{\beta}$ | 1.44                                  | 1.45                                                           | 1.42                                                          |
| Pyrrol4 C $_{\alpha}$ -C $_{\beta}$ | 1.41                                  | 1.41                                                           | 1.42                                                          |
| (average valour)                    | 1.43                                  | 1.43                                                           | 1.42                                                          |
| Pyrrol1 C $_{\alpha}$ -C $_{meso}$  | 1.43                                  | 1.43                                                           | 1.45                                                          |
| Pyrrol2 C $_{\alpha}$ -C $_{meso}$  | 1.43                                  | 1.44                                                           | 1.45                                                          |
| Pyrrol3 C $_{\alpha}$ -C $_{meso}$  | 1.43                                  | 1.43                                                           | 1.45                                                          |
| Pyrrol4 C $_{\alpha}$ -C $_{meso}$  | 1.43                                  | 1.44                                                           | 1.44                                                          |
| (average valour)                    | 1.43                                  | 1.44                                                           | 1.45                                                          |
| C $_{\beta}$ -C $_{meso}$           | 2.53                                  | 2.54                                                           | 2.56                                                          |
| C $_{\beta}$ -C $_{meso}$           | 2,54                                  | 2.54                                                           | 2.55                                                          |
| C $_{\beta}$ -C $_{meso}$           | 2.53                                  | 2.53                                                           | 2.55                                                          |
| C $_{\beta}$ -C $_{meso}$           | 2.54                                  | 2.54                                                           | 2.52                                                          |
| (average valour)                    | 2.54                                  | 2.54                                                           | 2.55                                                          |

**Table S5.** Optimised dihedral angles ( $^{\circ}$ ) of *p*-TMPyP on MMT, *p*-TMPyP intercalated into anhydrous MMT, and *p*-TMPyP intercalated into hydrated MMT.

| Bonds                                                                                                               | Dihedral angles of <i>p</i> -TMPyP on MMT | Dihedral angles of <i>p</i> -TMPyP intercalated into anhydrous MMT | Dihedral angles of <i>p</i> -TMPyP intercalated into hydrated MMT |
|---------------------------------------------------------------------------------------------------------------------|-------------------------------------------|--------------------------------------------------------------------|-------------------------------------------------------------------|
| <b>Pyrrol1 C<math>_{\alpha}</math>-C<math>_{meso}</math>-C<math>_{\alpha}</math>-C<math>_{\beta}</math> Pyrrol2</b> | 159.63                                    | 159.43                                                             | 150.68                                                            |
| <b>Pyrrol2 C<math>_{\beta}</math>-C<math>_{\alpha}</math>-C<math>_{meso}</math>-C<math>_{\alpha}</math> Pyrrol3</b> | 159.85                                    | 160.53                                                             | 160.58                                                            |
| <b>Pyrrol3 C<math>_{\alpha}</math>-C<math>_{meso}</math>-C<math>_{\alpha}</math>-C<math>_{\beta}</math> Pyrrol4</b> | 161.60                                    | 158.11                                                             | 144.89                                                            |
| <b>Pyrrol4 C<math>_{\beta}</math>-C<math>_{\alpha}</math>-C<math>_{meso}</math>-C<math>_{\alpha}</math> Pyrrol1</b> | 161.94                                    | 159.12                                                             | 149.35                                                            |
| <b>(average valour)</b>                                                                                             | 161.38                                    | 159.30                                                             | 151.38                                                            |
| <b>Methyl-pyridyl dihedral 1</b>                                                                                    | 43.39                                     | 41.12                                                              | 34.97                                                             |
| <b>Methyl-pyridyl dihedral 2</b>                                                                                    | 43.53                                     | 41.94                                                              | 39.49                                                             |
| <b>Methyl-pyridyl dihedral 3</b>                                                                                    | 42.76                                     | 40.11                                                              | 35.89                                                             |
| <b>Methyl-pyridyl dihedral 4</b>                                                                                    | 42.75                                     | 39.44                                                              | 44.15                                                             |
| <b>(average valour)</b>                                                                                             | 43.10                                     | 40.65                                                              | 38.63                                                             |

**Table S6** Optimised bond lengths ( $\text{\AA}$ ) *m*-TMPyP intercalated into anhydrous MMT and *m*-TMPyP intercalated into hydrated MMT.

| Bonds                                                         | Bond length in <i>m</i> -TMPyP intercalated into anhydrous MMT | Bond length in <i>m</i> -TMPyP intercalated into hydrated MMT |
|---------------------------------------------------------------|----------------------------------------------------------------|---------------------------------------------------------------|
| <b>Pyrrol1 C<math>_{\alpha}</math>-C<math>_{\beta}</math></b> | 1.47                                                           | 1.43                                                          |
| <b>Pyrrol2 C<math>_{\alpha}</math>-C<math>_{\beta}</math></b> | 1.44                                                           | 1.43                                                          |
| <b>Pyrrol3 C<math>_{\alpha}</math>-C<math>_{\beta}</math></b> | 1.47                                                           | 1.44                                                          |
| <b>Pyrrol4 C<math>_{\alpha}</math>-C<math>_{\beta}</math></b> | 1.44                                                           | 1.43                                                          |
| <b>(average valour)</b>                                       | 1.46                                                           | 1.43                                                          |
| <b>Pyrrol1 C<math>_{\alpha}</math>-C<math>_{meso}</math></b>  | 1.41                                                           | 1.44                                                          |
| <b>Pyrrol2 C<math>_{\alpha}</math>-C<math>_{meso}</math></b>  | 1.41                                                           | 1.42                                                          |
| <b>Pyrrol3 C<math>_{\alpha}</math>-C<math>_{meso}</math></b>  | 1.41                                                           | 1.44                                                          |
| <b>Pyrrol4 C<math>_{\alpha}</math>-C<math>_{meso}</math></b>  | 1.41                                                           | 1.42                                                          |
| <b>(average valour)</b>                                       | 1.41                                                           | 1.43                                                          |
| <b>C<math>_{\beta}</math>-C<math>_{meso}</math></b>           | 2.54                                                           | 2.52                                                          |
| <b>C<math>_{\beta}</math>-C<math>_{meso}</math></b>           | 2.55                                                           | 2.55                                                          |
| <b>C<math>_{\beta}</math>-C<math>_{meso}</math></b>           | 2.54                                                           | 2.54                                                          |
| <b>C<math>_{\beta}</math>-C<math>_{meso}</math></b>           | 2.55                                                           | 2.55                                                          |
| <b>(average valour)</b>                                       | 2.55                                                           | 2.54                                                          |

**Table S7** Optimised dihedral angles ( $^{\circ}$ ) of *m*-TMPyP intercalated into anhydrous MMT and *m*-TMPyP intercalated into hydrated MMT.

| <b>Bonds</b>                                                                                                               | <b>Dihedral angles of<br/><i>m</i>-TMPyP<br/>intercalated into<br/>anhydrous MMT</b> | <b>Dihedral angles of<br/>in <i>m</i>-TMPyP<br/>intercalated into<br/>hydrated MMT</b> |
|----------------------------------------------------------------------------------------------------------------------------|--------------------------------------------------------------------------------------|----------------------------------------------------------------------------------------|
| <b>Pyrrol1 C<math>_{\alpha}</math>-C<math>_{\text{meso}}</math>-C<math>_{\alpha}</math>-C<math>_{\beta}</math> Pyrrol2</b> | 175.27                                                                               | 171.92                                                                                 |
| <b>Pyrrol2 C<math>_{\beta}</math>-C<math>_{\alpha}</math>-C<math>_{\text{meso}}</math>-C<math>_{\alpha}</math> Pyrrol3</b> | 175.17                                                                               | 170.80                                                                                 |
| <b>Pyrrol3 C<math>_{\alpha}</math>-C<math>_{\text{meso}}</math>-C<math>_{\alpha}</math>-C<math>_{\beta}</math> Pyrrol4</b> | 175.27                                                                               | 163.57                                                                                 |
| <b>Pyrrol4 C<math>_{\beta}</math>-C<math>_{\alpha}</math>-C<math>_{\text{meso}}</math>-C<math>_{\alpha}</math> Pyrrol1</b> | 175.22                                                                               | 156.86                                                                                 |
| <b>(average valour)</b>                                                                                                    | 175.23                                                                               | 165.79                                                                                 |
| <b>Methyl-pyridyl dihedral 1</b>                                                                                           | 63.61                                                                                | 51.57                                                                                  |
| <b>Methyl-pyridyl dihedral 2</b>                                                                                           | 63.78                                                                                | 46.05                                                                                  |
| <b>Methyl-pyridyl dihedral 3</b>                                                                                           | 64.27                                                                                | 63.25                                                                                  |
| <b>Methyl-pyridyl dihedral 4</b>                                                                                           | 64.38                                                                                | 60.86                                                                                  |
| <b>(average valour)</b>                                                                                                    | 64.01                                                                                | 55.43                                                                                  |

Video - The relaxation of the *p*-TMPyP intercalated into MMT

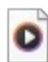

VIDEO-Suarez et al.mp4
